# Supplementary material
Source: Research Square preprint supplement (doi:10.21203/rs.3.rs-9931320/v1)
Supplement: Supplementary file 1 [file 3345d2599367997c9e7e0ca7.docx]

**Supplementary Information for**

**On-chip Thulium-doped Thin-film Lithium Niobate Microcavity Laser**

Luyao Li 1, Zhiwei Fang 1,3,*, Yang Tan 2,*, Zhaoxiang Liu 1, Qinfen Huang 1, Huiting Song 1, Li Shi 4, Qiyue Hu 1, Qingya Dai 1, Shiji Dou 1, Jianfei Xu 1, Kaifan Zhao 1, Renhong Gao 1, Yunpeng Song 1, Shanming Li 4, Ya Cheng 1,3,*

*1The Extreme Optoelectromechanics Laboratory (XXL), School of Physics, East China Normal University, Shanghai 200241, China*

*2School of Physics, Shandong University, Jinan, Shandong 250100, China*

*3Hefei National Laboratory, Hefei 230088, China*

*4Advanced Laser and Optoelectronic Functional Materials Department, Shanghai Institute of Optics and Fine Mechanics, Chinese Academy of Sciences, Shanghai 201800, China*

*Corresponding author: Zhiwei Fang ([zwfang@phy.ecnu.edu.cn](mailto:zwfang@phy.ecnu.edu.cn)); Yang Tan ([tanyang@sdu.edu.cn](mailto:tanyang@sdu.edu.cn))；Ya Cheng ([ya.cheng@siom.ac.cn](mailto:ya.cheng@siom.ac.cn) ).

**Section I: Elemental and optical characterization of bulk thulium-doped lithium niobate**

**Section II: Lasing characteristics under a different coupling condition**

**Section III: Simulation of lasing modes in the microcavity**

**Figures S1-S5**

**Table S1**

**References**

**Section I: Elemental and optical characterization of bulk thulium-doped lithium niobate**

To evaluate the quality of the bulk thulium-doped lithium niobate (Tm: LN) crystal grown by the Czochralski method, the surface elemental composition and chemical states of a double-side-polished, 500-μm-thick, Z-cut Tm: LN wafer were systematically characterized using an X-ray photoelectron spectrometer (ESCALAB Xi+, Thermo Fisher Scientific Inc.). **Figure S1** presents the X-ray photoelectron spectroscopy (XPS) characterization results of the Tm: LN crystal. All binding energies were calibrated with reference to the C 1s peak of adventitious carbon at 284.8 eV. The survey spectrum in **Figure S1(a)** exhibits the characteristic photoelectron peaks of Nb, O, Li, and Tm, together with the corresponding Auger transitions. Apart from a trace amount of surface-adsorbed carbon, no extraneous impurity elements were detected, demonstrating that the as-grown Tm: LN crystal possesses an ideal chemical composition and high purity.

**Figure S1(b)** shows the high-resolution Nb 3d detail scan. The spectrum displays the characteristic spin–orbit-split doublet with the Nb 3d5/2 and Nb 3d3/2 peaks located at binding energies of approximately 206.5 eV and 209.2 eV, respectively. The peak shape, positions, and relative intensities are in good agreement with those reported for Nb5+ in LiNbO3[1, 2], confirming that niobium exists exclusively in the +5 oxidation state within the lattice. **Figure S1(c)** presents the Li 1s peak centered at ~54 eV, which corresponds to Li+ ions in the LiNbO3 lattice. No other lithium chemical states are observed, indicating that the lithium ions reside in a well-defined octahedral coordination environment; the adjacent feature at 59.5 eV is attributed to the Nb 4s core level. The O 1s detail scan in **Figure S1(d)** can be deconvolved into two primary contributions: the main peak at approximately 529.6 eV is assigned to lattice oxygen (O2−) within the oxygen octahedra, whereas the asymmetric broadening on the higher-binding-energy side likely originates from chemisorbed oxygen or hydroxyl species on the crystal surface[3]. However, some researchers have attributed this high-binding-energy asymmetry to the influence of the ferroelectric polarization direction on the surface chemical states of LN, suggesting that it is associated with oxygen vacancies or aggregated adsorbed oxygen atoms induced by the surface polarity of the material[4]. **Figure S1(e)** displays the high-resolution Tm 4d XPS spectrum. The spectrum exhibits an asymmetric peak at a binding energy of ~176.4 eV, corresponding to the Tm 4d5/2 transition of Tm3+. The peak position and the accompanying satellite structure unambiguously exclude the presence of other valence states of Tm, directly confirming that the doped thulium ions are incorporated into the host lattice in the stable +3 oxidation state, thereby providing a crucial chemical-state basis for the intended optical transitions. **Table S1** presents a semi-quantitative analysis of the elemental composition of the Tm: LN crystal surface determined by XPS. The atomic percentage of Tm is 0.07 at. %, which corresponds to approximately 0.5 mol. % relative to the LiNbO3 molecule, consistent with our intended doping level.

In summary, the XPS analysis provides strong support for the intended valence states, chemical environments, and concentrations of the constituent elements in the Tm: LN crystal, demonstrating that high-quality thulium-doped lithium niobate crystals can be grown by the Czochralski method.

**Figure S1. X-ray photoelectron spectroscopy (XPS) of the bulk Tm: LN crystal.** (a) XPS survey spectrum of the Tm: LN crystal. (b) High-resolution detail scan of Nb 3d. (c) High-resolution detail scan of Li 1s (together with Nb 4s). (d) High-resolution detail scan of O 1s. (e) High-resolution detail scan of Tm 4d.

**Table S1. Elemental composition of bulk Tm: LN determined by XPS.**

| Name | Atomic % |
| --- | --- |
| C 1s | 18.24 |
| O 1s | 51.55 |
| Li 1s | 13.91 |
| Tm 4d | 0.07 |
| Nb 3d | 16.23 |

To characterize the optical properties of the bulk Tm:LN crystal, the absorption and photoluminescence (PL) spectra of a double-side-polished, 500-μm-thick, Z-cut Tm:LN wafer were measured. **Figure S2(a)** presents the absorption spectrum obtained with a UV-Vis-NIR spectrophotometer (Cary 5000, Agilent Technologies Inc.). A strong absorption peak centered at approximately 785 nm is observed, corresponding to the 3H6 → 3H4 transition of Tm3+. This is the reason for selecting a 785 nm laser as the pump source. **Figure S2(b)** shows the PL spectrum recorded with a fluorescence spectrometer (FLS 920, Edinburgh Instruments Inc.). To more intuitively display the fluorescence emission arising from each energy-level transition, the vertical axis represents the fluorescence intensity normalized and plotted on a logarithmic scale. A broad and intense emission band is observed in the range of 1.6–2.1 μm, attributed to the 3F4 → 3H6 transition of Tm3+. In contrast, the emission band near 2.38 μm, which corresponds to the 3H4 → 3H5 transition of Tm3+, is considerably narrower and exhibits much weaker intensity. Consequently, the laser performance at ~2.4 μm is, in general, significantly inferior to that at ~1.9 μm.

**Figure S2. Optical characterization of bulk Tm:LN.** (a) Absorption spectrum of the Tm:LN crystal. (b) Photoluminescence (PL) spectrum of the Tm:LN crystal.

**Section II: Lasing characteristics under a different coupling condition**

**Figure S3. Lasing characteristics under a different coupling condition.** (a) Evolution of the laser spectra with pump power. (b) Comparison of the output powers of the ~1.9 μm and ~2.4 μm lasers as functions of pump power.

**Figure S3(a)** shows the evolution of the laser spectra of the microcavity with pump power after fine adjustment of the coupling position between the tapered fiber and the microdisk, and **Figure S3(b)** presents the output powers of the ~1.9 μm and ~2.4 μm lasers as functions of pump power under this coupling condition. As can be seen, although the threshold of the ~2.4 μm laser is higher than that of the ~1.9 μm laser, the output power of the ~2.4 μm laser catches up with that of the ~1.9 μm laser as the pump power increases, and the maximum peak power of the ~2.4 μm laser even surpasses that of the ~1.9 μm laser. This demonstrates that the coupling condition between the microcavity and the tapered fiber strongly influences the lasing performance of the microcavity.

**Section III: Simulation of lasing modes in the microcavity.**

**Figure S4.** (a-c) Simulated intensity distributions of the TE modes at 785 nm, 1938.5 nm, and 2376.42 nm. (d-f) Simulated intensity distributions of the TM modes at 785 nm, 1938.5 nm, and 2376.42 nm.

We simulated the intensity distributions of the pump light and the signal light inside the microcavity using COMSOL Multiphysics (COMSOL 6.4.0.378). The laser signals at 1938.5 nm and 2376.42 nm were selected as representatives of the ~1.9 μm and ~2.4 μm multimode lasing, respectively. The side-view SEM image of the microdisk was imported into the software to extract the edge profile; this modeling approach ensures the simulation accuracy to the greatest possible extent. **Figures S4(a-c)** present the simulated intensity distributions of the TE modes at 785 nm (pump), 1938.5 nm, and 2376.42 nm, respectively, and **Figures S4(d-f)** present the simulated intensity distributions of the TM modes at the same three wavelengths.

**References**

1. Steiner, P. & Höchst, H. X-ray excited photoelectron spectra of LiNbO3: A quantitative analysis. Zeitschrift für Physik B Condensed Matter **35**, 51–59 (1979).
2. Iwanowski, R. J. et al. X-ray photoelectron spectra of crystalline LiNbO3:(Er,Yb). *Applied Surface Science* **136**, 95-98 (1998).
3. Tabata, K. et al. The topmost structure of annealed single crystal of LiNbO3. *Surface Science* **408**, 137-145 (1998).
4. Yun, Y. et al. Geometric and electronic structure of positively and negatively poled LiNbO3 (0001) surfaces. *Surface Science* **601**, 4636-4647 (2007).
